# Supplementary material for: Facile Synthesis of Fluorinated Polysilazanes and Their Durable Icephobicity on Rough Al Surfaces
Source: MDPI journal article supplement (doi:10.3390/polym14020330), 2022-01-14
Supplement: s1 [file s1]

Supporting Information

# Facile Synthesis of Fluorinated Polysilazanes and Their Durable Icephobicity on Rough Al Surfaces

Tien N. H. Lo,<sup>1</sup> Sung Woo Hong<sup>1</sup> and Ha Soo Hwang<sup>2,\*</sup> In Park<sup>1,3,\*</sup>

<sup>1</sup> Research Institute of Clean Manufacturing System, Korea Institute of Industrial Technology (KITECH), 89 Yangdaegiro-gil, Ipjang-myeon, Cheonan 31056, South Korea

<sup>2</sup> R&D center, OomphChem Inc., 1223-24 Cheonan-daero, Seobuk-gu, Cheonan, 31080, South Korea

<sup>3</sup> KITECH school, University of Science and Technology (UST), 176 Gajeong-dong, Yuseong-gu, Daejeon 34113, South Korea

\* Correspondence: heliocity@naver.com (Ha Soo Hwang), inpark@kitech.re.kr (In Park)

## Sand impact test

The mechanical durability of the superhydrophobic surfaces was evaluated and the durability of the FPSZ coatings on micro-nanostructured Al surfaces was compared with that of the FAS-17 coating. Sand impact tests were performed by dropping 10 g of sea sand (100–300  $\mu\text{m}$ ) onto the tilted substrate surface (tilt angle of 45°) for 1 min from a 30 cm height above the substrate [S1].

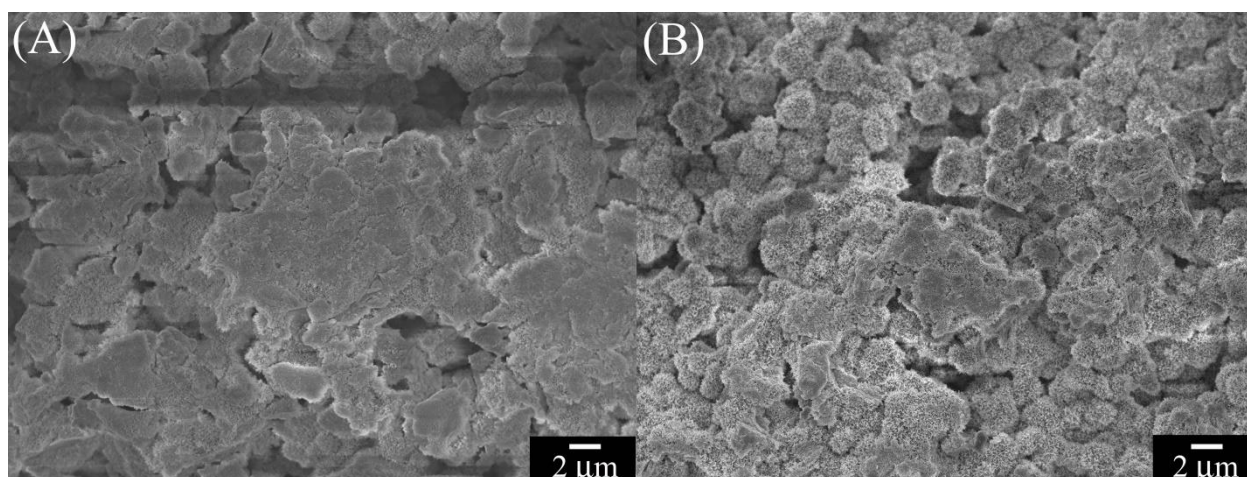

**Figure S1.** SEM images of (A) FAS-17- and (B) FPSZ<sub>17.3</sub>-coated Al samples after sand impact.

### Reference

- [S1] Y. Zhang, D. Ge, S. Yang, Spray-coating of superhydrophobic aluminum alloys with enhanced mechanical robustness, J. Colloid Interface Sci. 423 (2014) 101–107. <https://doi.org/10.1016/j.jcis.2014.02.024>.
